# Supplementary material
Source: Research Square preprint supplement (doi:10.21203/rs.3.rs-8734330/v1)
Supplement: Supplementary file 1 [file f4d46ed12e00c9a65d3cf2e1.docx]

**Factors influencing access to green health prescribing in primary care for older adults – A qualitative systematic review**

**Additional files**

Additional file 1: Table. S1: PRISMA checklist

Additional file 2: Table. S2: ENTREQ checklist

Additional file 3: Table. S3: GRIPP2-SF

Additional file 4: Table. S4: Search strategy

Additional file 5: Table. S5: Characteristics of studies providing evidence on barriers and enablers for GHP and nature-based interventions

Additional file 6: Table. S6: MMAT Quality assessment scores

Additional file 7: Table. S7: Supporting quotes of barriers

Additional file 8: Table. S8: Supporting quotes of enablers

**Additional file 1 : Table S1 : PRISMA Checklist**

| **Section and Topic** | **Item #** | **Checklist item** | **Location where item is reported** |
| --- | --- | --- | --- |
| **TITLE** | | |  |
| Title | 1 | Identify the report as a systematic review. | Title, 1 |
| **ABSTRACT** | | |  |
| Abstract | 2 | See the PRISMA 2020 for Abstracts checklist. | Abstract, 2-3 |
| **INTRODUCTION** | | |  |
| Rationale | 3 | Describe the rationale for the review in the context of existing knowledge. | p.4-5 |
| Objectives | 4 | Provide an explicit statement of the objective(s) or question(s) the review addresses. | p.5 |
| **METHODS** | | |  |
| Eligibility criteria | 5 | Specify the inclusion and exclusion criteria for the review and how studies were grouped for the syntheses. | p.8-9 (2.3), Table 2 |
| Information sources | 6 | Specify all databases, registers, websites, organisations, reference lists and other sources searched or consulted to identify studies. Specify the date when each source was last searched or consulted. | p.8 (2.2) |
| Search strategy | 7 | Present the full search strategies for all databases, registers and websites, including any filters and limits used. | p.8, Additional file 5: Table S5 |
| Selection process | 8 | Specify the methods used to decide whether a study met the inclusion criteria of the review, including how many reviewers screened each record and each report retrieved, whether they worked independently, and if applicable, details of automation tools used in the process. | p.8 (2.3) |
| Data collection process | 9 | Specify the methods used to collect data from reports, including how many reviewers collected data from each report, whether they worked independently, any processes for obtaining or confirming data from study investigators, and if applicable, details of automation tools used in the process. | p.10 -11 (2.4) |
| Data items | 10a | List and define all outcomes for which data were sought. Specify whether all results that were compatible with each outcome domain in each study were sought (e.g. for all measures, time points, analyses), and if not, the methods used to decide which results to collect. | p.10-11 |
| 10b | List and define all other variables for which data were sought (e.g. participant and intervention characteristics, funding sources). Describe any assumptions made about any missing or unclear information. | p.10-11(2.4) |
| Study risk of bias assessment | 11 | Specify the methods used to assess risk of bias in the included studies, including details of the tool(s) used, how many reviewers assessed each study and whether they worked independently, and if applicable, details of automation tools used in the process. | p.10 (2.5) |
| Effect measures | 12 | Specify for each outcome the effect measure(s) (e.g. risk ratio, mean difference) used in the synthesis or presentation of results. | NA |
| Synthesis methods | 13a | Describe the processes used to decide which studies were eligible for each synthesis (e.g. tabulating the study intervention characteristics and comparing against the planned groups for each synthesis (item #5)). | p.11 (2.6) |
| 13b | Describe any methods required to prepare the data for presentation or synthesis, such as handling of missing summary statistics, or data conversions. | NA |
| 13c | Describe any methods used to tabulate or visually display results of individual studies and syntheses. | p.11 (2.6) |
| 13d | Describe any methods used to synthesize results and provide a rationale for the choice(s). If meta-analysis was performed, describe the model(s), method(s) to identify the presence and extent of statistical heterogeneity, and software package(s) used. | p.11 (2.6) |
| 13e | Describe any methods used to explore possible causes of heterogeneity among study results (e.g. subgroup analysis, meta-regression). | NA |
| 13f | Describe any sensitivity analyses conducted to assess robustness of the synthesized results. | NA |
| Reporting bias assessment | 14 | Describe any methods used to assess risk of bias due to missing results in a synthesis (arising from reporting biases). | NR |
| Certainty assessment | 15 | Describe any methods used to assess certainty (or confidence) in the body of evidence for an outcome. | NA |
| **RESULTS** | | |  |
| Study selection | 16a | Describe the results of the search and selection process, from the number of records identified in the search to the number of studies included in the review, ideally using a flow diagram. | p.11-13 (3.1) Figure 1 |
| 16b | Cite studies that might appear to meet the inclusion criteria, but which were excluded, and explain why they were excluded. | NR |
| Study characteristics | 17 | Cite each included study and present its characteristics. | p.14 (3.2), Additional file 5: Table S5 |
| Risk of bias in studies | 18 | Present assessments of risk of bias for each included study. | p.14-15, (3.3), Additional file 6: Table: S6 |
| Results of individual studies | 19 | For all outcomes, present, for each study: (a) summary statistics for each group (where appropriate) and (b) an effect estimate and its precision (e.g. confidence/credible interval), ideally using structured tables or plots. | NA |
| Results of syntheses | 20a | For each synthesis, briefly summarise the characteristics and risk of bias among contributing studies. | p.14-15 (3.2, 3.3) |
| 20b | Present results of all statistical syntheses conducted. If meta-analysis was done, present for each the summary estimate and its precision (e.g. confidence/credible interval) and measures of statistical heterogeneity. If comparing groups, describe the direction of the effect. | NA |
| 20c | Present results of all investigations of possible causes of heterogeneity among study results. | NA |
| 20d | Present results of all sensitivity analyses conducted to assess the robustness of the synthesized results. | NA |
| Reporting biases | 21 | Present assessments of risk of bias due to missing results (arising from reporting biases) for each synthesis assessed. | NR |
| Certainty of evidence | 22 | Present assessments of certainty (or confidence) in the body of evidence for each outcome assessed. | NA |
| **DISCUSSION** | | |  |
| Discussion | 23a | Provide a general interpretation of the results in the context of other evidence. | p.30-33, (4.1, 4.2) |
| 23b | Discuss any limitations of the evidence included in the review. | p.33-34 (4.3) |
| 23c | Discuss any limitations of the review processes used. | p.33-34 (4.3) |
| 23d | Discuss implications of the results for practice, policy, and future research. | p.34-35 (4.4, 4.5) |
| **OTHER INFORMATION** | | |  |
| Registration and protocol | 24a | Provide registration information for the review, including register name and registration number, or state that the review was not registered. | p. 3,6, |
| 24b | Indicate where the review protocol can be accessed, or state that a protocol was not prepared. | 6 |
| 24c | Describe and explain any amendments to information provided at registration or in the protocol. | 6 |
| Support | 25 | Describe sources of financial or non-financial support for the review, and the role of the funders or sponsors in the review. | p.43 |
| Competing interests | 26 | Declare any competing interests of review authors. | P.43 |
| Availability of data, code and other materials | 27 | Report which of the following are publicly available and where they can be found: template data collection forms; data extracted from included studies; data used for all analyses; analytic code; any other materials used in the review. | Additional file 1: (PRISMA checklist), Additional file 2 (ENTREQ checklist), Additional file 3 (GRIPP2-SF), Additional file 4 (Search strategy)  Additional file 5 (Characteristics of studies)  Additional file 6 (MMAT Quality assessment scores), Additional file 7: (quotes of barriers), Additional file 8 (quotes of enablers) |

**Additional file 2: Table S2: ENTREQ Checklist**

| **Item** | **Guide and description** | **Reported**  **on page #** |
| --- | --- | --- |
| Aim | State the research question the synthesis addresses | 5 |
| Synthesis methodology | Identify the synthesis methodology or theoretical framework which underpins the synthesis and describe the rationale for choice of methodology (e.g. meta-ethnography, thematic synthesis, critical interpretive synthesis, grounded theory synthesis, realist synthesis, meta-aggregation, meta-study, framework synthesis). | 10-11 |
| Approach to searching | Indicate whether the search was pre-planned (comprehensive search strategies to seek all available studies) or iterative (to seek all available concepts until theoretical saturation is achieved). | 8 |
| Inclusion criteria | Specify the inclusion/exclusion criteria (e.g. in terms of population, language, year limits, type of publication, study type). | 9, Table 2 |
| Data sources | Describe the information sources used (e.g. electronic databases (MEDLINE, EMBASE, CINAHL, psychINFO, Econlit), grey literature databases (digital thesis, policy reports), relevant organisational websites, experts, information specialists, generic web searches (Google Scholar), hand searching, reference lists) and when the searches were conducted; provide the rationale for using the data sources. | 8 |
| Electronic Search strategy | Describe the literature search (e.g. provide electronic search strategies with population terms, clinical or health topic terms, experiential or social phenomena related terms, filters for qualitative research and search limits). | 8, Additional file 4 |
| Study screening methods | Describe the process of study screening and sifting (e.g. title, abstract and full text review, number of independent reviewers who screened studies) | 8 |
| Study characteristics | Present the characteristics of the included studies (e.g. year of publication, country, population, number of participants, data collection, methodology, analysis, research questions). | 14, Additional file 5 |
| Study selection results | Identify the number of studies screened and provide reasons for study exclusion (e.g. for comprehensive searching, provide numbers of studies screened and reasons for exclusion indicated in a figure/flowchart; for iterative searching describe reasons for study exclusion and inclusion based on modifications t the research question and/or contribution to theory development). | 13, Figure 1 |
| Rationale for appraisal | Describe the rationale and approach used to appraise the included studies or selected findings (e.g. assessment of conduct (validity and robustness), assessment of reporting (transparency), assessment of content and utility of the findings). | 10-11 |
| Appraisal items | State the tools, frameworks and criteria used to appraise the studies or selected findings (e.g. Existing tools: CASP, QARI, COREQ, Mays and Pope [25]; reviewer developed tools; describe the domains assessed: research team, study design, data analysis and interpretations, reporting). | 10-11 |
| Appraisal process | Indicate whether the appraisal was conducted independently by more than one reviewer and if consensus was required. | 10 |
| Appraisal results | Present results of the quality assessment and indicate which articles, if any, were weighted/excluded based on the assessment and give the rationale. | 14-15, Additional file 6 |
| Data extraction | Indicate which sections of the primary studies were analysed and how were the data extracted from the primary studies? | 10 |
| Software | State the computer software used, if any. | NA |
| Number of reviewers | Identify who was involved in coding and analysis. | 10 |
| Coding | Describe the process for coding of data (e.g. line by line coding to search for concepts). | 11 |
| Study comparison | Describe how were comparisons made within and across studies (e.g. subsequent studies were coded into pre-existing concepts, and new concepts were created when deemed necessary). | 11 |
| Derivation of themes | Explain whether the process of deriving the themes or constructs was inductive or deductive. | 11 |
| Quotations | Provide quotations from the primary studies to illustrate themes/constructs, and identify whether the quotations were participant quotations or interpretation | 15-27  Tables 3 and 4  Additional files 7 and 8 |
| Synthesis output | Present rich, compelling and useful results that go beyond a summary of the primary studies (e.g. new interpretation, models of evidence, conceptual models, analytical framework, development of a new theory or construct). | 15-29,  Figure 2 |

**Additional file 3: Table S3: GRIPP2-SF**

| **Section and topic** | **Item** | **Reported on page no.** |
| --- | --- | --- |
| 1: Aim: Report the aim of the study | To conduct a qualitative systematic review, exploring the barriers and enablers for increasing access to GHP and engagement of healthcare providers and participants with nature-based interventions for older people. The aim of the co production group was to collectively gather feedback on people’s experience, perspectives and viewpoints of prescribing NBIs and undertaking nature-based interventions. This helped build our review, incorporating the experiences and perspectives from prescribers, service providers and service users in our organisation and interpretation of evidence. | 5-6 |
| 2: Methods: Provide a clear description of the methods used for PPI in the study | We tried to establish a PPI group which would allow us to understand the experiences, perceptions and concerns of both the service users and service providers with regard to GHP and/or nature-based interventions in real practice. Through internet searches and our own research network, we identified a few organisations which may have been involved in the provision of green health prescribing services in the UK. We contacted them initially by e-mails to introduce our project and explain our purposes for establishing the PPI group. This was followed by phone calls or online meetings, during which we confirmed their willingness to join the PPI group and asked if they could connect us with potential service users who would show an interest in being part of the PPI group.  Eventually we recruited six PPI group members which consisted of a general practitioner (GP) and two service providers who have been involved in running a GHP related organisation and/or leading GHP related activities, and three service users who had experience in receiving and utilising nature-based interventions. PPI group members received information about the review and preliminary results in a series of meetings and shared their perspectives and practical experience with the review them. They critiqued/commented on the applicability of study findings, sense-checked our presentation/interpretation of findings​ and helped develop our logic model by sharing their lived experience.  We discussed a range of areas that included key questions or ideas about GHP (Green health prescriptions) in between meetings to help collate the perspectives of the co-production group. The group provided experiential evidence, commenting and advising on the emerging data extracted from the evidence review, thus influencing the review process (data extraction, resolving uncertainties, and data interpretation stage) to ensure a wider awareness of the contextual factors that can impact on the delivery of green prescribing. | 6 |
| 3: Study results: Outcomes – Report the study results of PPI in the study, including both positive and negative outcomes | Service providers described enablers and barriers to prescribing and facilitating nature-based interventions and/or related organisations. They highlighted the complexity in creating simple systems of co-design/production within GHP as it was a relatively new concept. Additionally, it was reported that social prescribing overall appears to be irrelevant to mainstream health professionals due to the systemic, practical and knowledge-based factors. Suggestions were made to empower patients in a leading role in their care; make GHP authentic and real; and involve more participants. Ideas were suggested to provide documents that validate service users’ experiences with health professionals based on the benefits they have gained. This can transform GHP participants’ anecdotal feeling into recognised, concrete evidence in the form of patient reported outcomes.  Key themes and connotations were identified. service providers highlighted some potential barriers of GHP. Patient centred experience was brought up in the meeting, with both patient’s understanding and clinician’s understanding of GHP being potentially limited. GP’s consultation skills in delivering green prescriptions were acknowledged as barrier. Funding and sustainability of prescribed interventions was remarked, as to whether there is a guarantee that the full intervention is going to be completed. The effect and impact of GHP is believed to be influenced by patients’ behaviour, addressing the importance of the behaviour change theoretical framework in designing and implementing the interventions. A key observation addressed in the meeting was the issue of socioeconomic disparities that may have a huge influence on the effectiveness of GHP. A key term used by a GP was ‘deep end practices’, which refers to general practices serving communities that experience the highest levels of socio-economic deprivation (bottom 1% socio-economic status). This is closely aligned with our research as to how GHP will serve those communities and whether it is practical for them. Our GP highlighted that patients from these particular communities are often engaged with other issues in life which are perceived as a priority in comparison to having the time and finance to improve their health. Therefore, it may be difficult to engage patients with GHP in practices within those deprived areas without addressing some of those more complex needs, which are the underlying issues.  Service users showed a great interest into our work and was able to provide their own experience of participating in nature-based activities such as gardening and community walks as part of GHP. Examples of these included community run organisations like Growing People Growing Places, which was a gardening project they had previously attended. They reported the benefits of this, which aimed to enable their rehabilitation journey. It was mentioned that the process of touching the plants, the smell, the weather, i.e. sunshine all plays a role in the rehabilitation process.  Other critical points included   - People talking to each other is a big positive experience. Hearing about other people’s day, being an introvert, it can really help you get out there and make new friends - Knowing other people have gone through or are going through the same or much worse situation really does help mentally, and creates a bond between us - A certificate issued at the end of the 12-week course provided a sense of achievement, something to be proud of which them mentally - They thought that a prescription administered by a primary care doctor/physician is more effective than programs that you can attend without the prescription - This prescribed component can also subconsciously allow us to take responsibility towards the program, rather than just choosing to go from personal choice based on the fact, it is supported by an advanced healthcare professional. | 34-35 |
| 4: Discussion and conclusions: Outcomes – Comment on the extent to which PPI influenced the study overall. Describe positive and negative effects | Patient and public contributors played a significant role in shaping key aspects of the study’s interpreting of findings and recommendations. The diverse and unique experiences and perspectives shared by the co-production group into the implementation of green prescribing within a UK context greatly enhanced the review team’s understanding of the many different forms and potential mechanisms of GHP and helped us to contextualise the evidence reported in the literature. They made the review team appreciate the personalised nature of GHP and sensitised us to the potential impact of nature-based interventions on spiritual wellbeing at personal level and on community cohesion at societal level. The very positive experience reported by service users may have made members of the review team leaning more towards a positive interpretation of reviewed evidence. Additionally, our PPI group discussed potential challenges with accessing and engaging in nature-based interventions. Discussing the potential challenges experienced by our PPI members further helped to understand suitable and practical recommendations that can benefit the individual. | 34-35 |
| 5: Reflections/critical perspective: Critical Perspective-Comment critically on the study, reflecting on the things that went well and those that did not, so others can learn from this experience | We initially planned to run the PPI group as a single group covering both service users and service providers. However, following the introductory meetings which we held separately with individual service provider(s) and service user(s) due to logistic reasons, we decided to keep the two groups separate as we noticed that the focus, content and pace of discussions differed substantially between the groups. This arrangement may have enabled members of each group (service users vs service providers) to talk more freely about their genuine feelings, perceptions and issues that were most important to them without the discussions being dominated by one group. On the other, keeping the groups separate may have resulted in some missed opportunities for PPI group members to share different perspectives, which could trigger further thoughts and foster sharing understanding. However, we brought the two groups together in a final meeting in which we have shared the final review findings with them.  The PPI within this systematic review demonstrated vast and practical experience of both partaking in nature-based interventions and administering these as prescriptions. This was the primary strength of the PPI involvement, providing the invaluable real-world perspectives into the review. This helped validate some of the key points that we identified in the literature through demonstrating that these were also picked up by public contributors. What went well was the consistent engagement and interest of the PPI group members throughout the review process. Arranging future meetings was easier because of consistent engagement and inclusivity, providing useful input in different stages of the review.  A significant challenge throughout the PPI process of this review was the difficulty in aligning group members’ availability and collectively holding a meeting based on everyone’s timescales. We overcame this through holding separate meetings with different PPI group members in a flexible way, with the potential advantages and drawbacks described earlier. | NR in this manuscript, a separate paper focusing on PPI in this review is being considered |

**Additional file 4: Table S4: Search strategy (all sources)**

Search carried out 29th and 30th October 2024

**Ovid MEDLINE(R) ALL 1946 to October 28, 2024**

<https://ovidsp.ovid.com/ovidweb.cgi?T=JS&NEWS=N&PAGE=main&SHAREDSEARCHID=3dZXP9X8GYap7Qg07qlIPMFlRlGATsAbod6yo0HL0HDpuWbix17brRYdIOfh2a19S>

1 Middle Aged/ 4883680

2 exp Aged/ 3590243

3 Geriatrics/ 31832

4 Healthy Aging/ or Health Services for the Aged/ 20800

5 (Elder* or geriatric* or senior*).ti,ab,kf. 440798

6 (older adj (adult? or m#n or wom#n or person? or people)).ti,ab,kf. 209369

7 (Age? adj3 (over or older) adj2 (5# or 6# or 7# or 8# or 9#)).ti,ab,kf. 59713

8 (Quinquagenarian* or sexagenarian* or hexagenarian* or septuagenarian* or octogenarian* or nonagenarian* or centenarian* or gerontolog*).ti,ab,kf. 18140

9 (">=5# years old" or ">5# years old").ti,ab,kf. 19053

10 (">=6# years old" or ">6# years old").ti,ab,kf. 30436

11 (">=7# years old" or ">7# years old").ti,ab,kf. 18030

12 (">=8# years old" or ">8# years old").ti,ab,kf. 10965

13 (">=9# years old" or ">9# years old").ti,ab,kf. 3650

14 or/1-13 [Older people] 5973648

15 ((Green or blue) adj5 (space* or area*1 or zone*1 or corridor* or connector* or environment*1 or architecture* or infrastructure* or design* or setting* or surrounding* or urban or rural)).ti,ab,kf. 12829

16 (Greenspace* or bluespace*).ti,ab,kf. 950

17 ((Green or blue) adj5 (urban* or neighbourhood* or neighborhood* or community or communities or city or cities or town or towns or suburb* or semiurban or periurban or semisuburban or residential or municipal or metropolitan or metropolis* or agriculture or agricultural*)).ti,ab,kf. 4503

18 Environmental Exposure/ or "Ecological and Environmental Phenomena"/ or ecosystem/ or biodiversity/ 242134

19 ((Green* or eco* or environment* or nature*) adj3 health*).ti,ab,kf. 118230

20 ((Green or blue or outdoor* or natural or nature) adj5 (gym* or activit* or recreation*)).ti,ab,kf. 37282

21 Nature/ 1032

22 ((Natur* or nature-based or outdoor*) adj5 (intervention* or activit* or connect* or engage* or environment* or capital*)).ti,ab,kf. 79228

23 ((Natur* or nature-based or outdoor* or outside) adj3 (driven or orientated or space or setting* or expos* or time or surrounding*)).ti,ab,kf. 32217

24 agriculture/ or farms/ or "Oceans and Seas"/ or grassland/ or wetlands/ or exp forests/ 110094

25 (Ecotherap* or care farm*).ti,ab,kf. 112

26 gardening/ or gardens/ or horticultural therapy/ 1881

27 (Garden* or horticultur* or allotment*1).ti,ab,kf. 24269

28 bathing beaches/ or parks, recreational/ 4629

29 (Park or parks or parkland* or tree or trees or wood or woods or woodland* or forest* or river or rivers or ocean or oceans or beach or beaches or wilderness).ti,ab,kf. 468216

30 Golf/ or walking/ or running/ or Bicycling/ 79093

31 ((Outdoor* or park or lawn) adj3 bowl*).ti,ab,kf. 15

32 Swimming/ and (open water or openwater or outside or outdoor* or wild*).ti,ab,kf. 956

33 (Swim* adj3 (open water or openwater or outside or outdoor* or wild*)).ti,ab,kf. 391

34 (Forest* adj2 (therap* or bath*)).ti,ab,kf. 265

35 "Activities of Daily Living"/ or exercise/ or exercise therapy/ or Motor Activity/ or yoga/ or dancing/ or tai ji/ or relaxation therapy/ or recreation/ or (exercis* or gym* or walk* or running or yoga or tai chi or tai ji or relax* or leisure or leisurely or recreation* or dance or dancing or meditation).ti,ab,kf. 1071004

36 (outdoor* or outside* or natur* or urban* or rural*).ti,ab,kf. 1988297

37 35 and 36 71131

38 (or/15-34) or 37 [Green spaces or outdoor exercise] 1085961

39 exp Prescriptions/ 43136

40 "Referral and Consultation"/ 78495

41 (Prescription* or prescrib*).ti,ab,kf. 299836

42 General Practitioners/ or Physicians, Primary Care/ or nurse practitioners/ 35186

43 (GP or GPs).ti,ab,kf. 76107

44 Primary Health Care/ or Family Practice/ 158328

45 (primary adj4 (care or health* or service* or center* or centre* or practice*)).ti,ab,kf. 231834

46 ((general or nurse or nursing or family) adj (practice* or practitioner* or physician* or doctor* or nurs*)).ti,ab,kf. 168231

47 ((Communit* or primary or social* or scheme* or wellbeing or well-being or pathway*) adj3 (refer* or linkage or program* or treat* or intervention*)).ti,ab,kf. 210372

48 ((Communit* or patient*) adj2 (connector* or navigat* or advocat*)).ti,ab,kf. 7576

49 (link-worker* or linkworker*).ti,ab,kf. 195

50 or/39-49 [Prescribing] 990749

51 14 and 38 and 50 7907

52 limit 51 to yr="2000 -Current" 7152

53 limit 52 to english language 6890

**Embase Classic+Embase 1947 to 2024 October 28**

1 middle aged/ 2477435

2 aged/ or frail elderly/ or institutionalized elderly/ or very elderly/ 4153400

3 geriatrics/ 43541

4 healthy aging/ 5919

5 aging/ 353680

6 elderly care/ 43234

7 (Elder* or geriatric* or senior*).ti,ab,kf. 630708

8 (older adj (adult? or m#n or wom#n or person? or people)).ti,ab,kf. 263493

9 (Age? adj3 (over or older) adj2 (5# or 6# or 7# or 8# or 9#)).ti,ab,kf. 90437

10 (Quinquagenarian* or sexagenarian* or hexagenarian* or septuagenarian* or octogenarian* or nonagenarian* or centenarian* or gerontolog*).ti,ab,kf. 26954

11 (">=5# years old" or ">5# years old").ti,ab,kf. 39707

12 (">=6# years old" or ">6# years old").ti,ab,kf. 60919

13 (">=7# years old" or ">7# years old").ti,ab,kf. 37057

14 (">=8# years old" or ">8# years old").ti,ab,kf. 22437

15 (">=9# years old" or ">9# years old").ti,ab,kf. 7383

16 or/1-15 [Older people] 6180119

17 ((Green or blue) adj5 (space* or area*1 or zone*1 or corridor* or connector* or environment*1 or architecture* or infrastructure* or design* or setting* or surrounding* or urban or rural or gym*)).ti,ab,kf. 14791

18 (Greenspace* or bluespace*).ti,ab,kf. 970

19 ((Green or blue) adj5 (urban* or neighbourhood* or neighborhood* or community or communities or city or cities or town or towns or suburb* or semiurban or periurban or semisuburban or residential or municipal or metropolitan or metropolis* or agriculture or agricultural*)).ti,ab,kf. 4629

20 environmental exposure/ 135910

21 ecosystem/ 97278

22 biodiversity/ 54770

23 ((Green* or eco* or environment* or sustainable or nature*) adj3 health*).ti,ab,kf. 147938

24 ((Green or blue or outdoor* or natural or nature) adj5 (gym* or activit* or recreation*)).ti,ab,kf. 44964

25 ((Natur* or nature-based or outdoor*) adj5 (intervention* or activit* or connect* or engage* or environment* or capital*)).ti,ab,kf. 91865

26 ((Natur* or nature-based or outdoor* or outside) adj3 (driven or orientated or space or setting* or expos* or time or surrounding*)).ti,ab,kf. 39741

27 agriculture/ 62119

28 agriculture/ 62119

29 sea/ 24574

30 grassland/ 8592

31 wetland/ 12539

32 forest/ 37627

33 forest bathing/ 71

34 (Ecotherap* or care farm*).ti,ab,kf. 126

35 gardening/ 2622

36 "land use"/ 22504

37 horticultural therapy/ 209

38 (Garden* or horticultur* or allotment*1).ti,ab,kf. 26991

39 seashore/ 24009

40 recreational park/ or national park/ 5144

41 (Park or parks or parkland* or tree or trees or wood or woods or woodland* or forest* or river or rivers or ocean or oceans or beach or beaches or wilderness).ti,ab,kf. 542027

42 golf/ 1333

43 nordic walking/ or walking/ 95667

44 running/ 43054

45 cycling/ 17584

46 ((Outdoor* or park or lawn) adj3 bowl*).ti,ab,kf. 23

47 Swimming/ and (open water or openwater or outside or outdoor* or wild*).ti,ab,kf. 1566

48 (Swim* adj3 (open water or openwater or outside or outdoor* or wild*)).ti,ab,kf. 441

49 (Forest* adj2 (therap* or bath*)).ti,ab,kf. 302

50 daily life activity/ 125756

51 exercise/ 399214

52 kinesiotherapy/ 44496

53 motor activity/ 54926

54 exp yoga/ 12929

55 dancing/ 7391

56 Tai Chi/ 4432

57 relaxation training/ 12804

58 recreation/ 23236

59 (exercis* or gym* or walk* or running or yoga or tai chi or tai ji or relax* or leisure or leisurely or recreation* or dance or dancing or meditation).ti,ab,kf. 1139417

60 (or/50-59) and (outdoor* or outside* or natur* or urban* or rural*).ti,ab,kf. 93929

61 (or/17-49) or 60 [Green spaces or outdoor exercise] 1363467

62 prescription/ 277111

63 patient referral/ 174540

64 consultation/ or face-to-face consultation/ 162908

65 (Prescription* or prescrib*).ti,ab,kf. 508312

66 general practitioner/ 131081

67 general practice/ 95537

68 primary medical care/ 142882

69 nurse practitioner/ 30321

70 (GP or GPs).ti,ab,kf. 110440

71 primary health care/ 84198

72 (primary adj4 (care or health* or service* or center* or centre* or practice*)).ti,ab,kf. 315107

73 ((general or nurse or nursing or family) adj (practice* or practitioner* or physician* or doctor* or nurs*)).ti,ab,kf. 218537

74 ((Communit* or primary or social* or scheme* or wellbeing or well-being or pathway*) adj3 (refer* or linkage or program* or treat* or intervention*)).ti,ab,kf. 310272

75 ((Communit* or patient*) adj2 (connector* or navigat* or advocat*)).ti,ab,kf. 11952

76 (link-worker* or linkworker*).ti,ab,kf. 247

77 or/62-76 [Prescribing] 1727501

78 16 and 61 and 77 12525

79 limit 78 to yr="2000 -Current" 11910

80 limit 79 to english language 11636

**APA PsycInfo 1806 to October 2024 Week 4**

1 (aged* or very old*).ag. 419879

2 elderly.ti,ab,id. 70513

3 (Senior or geriatric*).ti,ab,id. 46171

4 (older adj (adult? or m#n or wom#n or person? or people)).ti,ab,id. 95933

5 exp Geriatrics/ 15937

6 Gerontology/ 10220

7 (Age? adj3 (over or older) adj2 (5# or 6# or 7# or 8# or 9#)).ti,ab,id. 18197

8 (Sexagenarian or septuagenarian or octogenarian or nonagenarian or centenarian or gerontolog*).ti,ab,id. 7645

9 (">=5# years old" or ">5# years old").ti,ab,id. 2156

10 (">=6# years old" or ">6# years old").ti,ab,id. 3657

11 (">=7# years old" or ">7# years old").ti,ab,id. 1799

12 (">=8# years old" or ">8# years old").ti,ab,id. 1457

13 (">=9# years old" or ">9# years old").ti,ab,id. 595

14 or/1-13 [Older persons] 497476

15 ((Green or blue) adj5 (space* or area*1 or zone*1 or corridor* or connector* or environment*1 or architecture* or infrastructure* or design* or setting* or surrounding* or urban or rural)).ti,ab,id. 1773

16 (Greenspace* or bluespace*).ti,ab,id. 181

17 ((Green or blue) adj5 (urban* or neighbourhood* or neighborhood* or community or communities or city or cities or town or towns or suburb* or semiurban or periurban or semisuburban or residential or municipal or metropolitan or metropolis* or agriculture or agricultural*)).ti,ab,id. 611

18 environment/ or environmental enrichment/ or "nature (environment)"/ or public space/ or environmental health/ or natural resources/ 25298

19 ecology/ or ecological factors/ or social ecology/ or natural resources/ or pro environmental behavior/ 11157

20 ((Green* or eco* or environment* or nature*) adj3 health*).ti,ab,id. 20303

21 ((Green or blue or outdoor* or natural or nature) adj5 (gym* or activit* or recreation*)).ti,ab,id. 5837

22 ((Natur* or nature-based or outdoor*) adj5 (intervention* or activit* or connect* or engage* or environment* or capital*)).ti,ab,id. 22280

23 ((Natur* or nature-based or outdoor* or outside) adj3 (driven or orientated or space or setting* or expos* or time or surrounding*)).ti,ab,id. 12946

24 agriculture/ or "plants (botanical)"/ or rural environments/ 27608

25 (Ecotherap* or care farm*).ti,ab,id. 157

26 horticulture therapy/ or nature-based interventions/ or recreation therapy/ 1083

27 (Garden* or horticultur* or allotment*1).ti,ab,id. 4179

28 recreation areas/ 1599

29 (Park or parks or parkland* or tree or trees or wood or woods or woodland* or forest* or river or rivers or ocean or oceans or beach or beaches or wilderness).ti,ab,id. 38849

30 walking/ 7742

31 Running/ 2573

32 Cycling/ 789

33 ((Outdoor* or park or lawn) adj3 bowl*).ti,ab,id. 6

34 Swimming/ and (open water or openwater or outside or outdoor* or wild*).ti,ab,id. 90

35 (Swim* adj3 (open water or openwater or outside or outdoor* or wild*)).ti,ab,id. 50

36 (Forest* adj2 (therap* or bath*)).ti,ab,id. 40

37 "activities of daily living"/ or physical mobility/ 10292

38 Exercise/ or Aerobic Exercise/ or Exercise Therapy/ 31866

39 Motor Performance/ 10652

40 Yoga/ 2675

41 Dance Therapy/ or Dance/ 4560

42 Physical Activity/ 29580

43 Relaxation Therapy/ 3084

44 Recreation/ or Recreation Therapy/ 7435

45 (exercis* or gym* or walk* or running or yoga or tai chi or tai ji or relax* or leisure or leisurely or recreation* or dance or dancing or meditation).ti,ab,id. 203442

46 (or/37-45) and (outdoor* or outside* or natur* or urban* or rural*).ti,ab,id. 27171

47 15 or 16 or 17 or 18 or 19 or 20 or 21 or 22 or 23 or 24 or 25 or 26 or 27 or 28 or 29 or 30 or 31 or 32 or 33 or 34 or 35 or 36 or 46 180827

48 social prescribing/ 81

49 treatment/ 85172

50 Self-Referral/ or Professional Referral/ 4192

51 (Prescription* or prescrib*).ti,ab,id. 57205

52 General Practitioners/ 6637

53 Primary Health Care/ 22893

54 (GP or GPs).ti,ab,id. 9484

55 Family Physicians/ 1672

56 (primary adj4 (care or health* or service* or center* or centre* or practice*)).ti,ab,id. 53110

57 ((general or nurse or nursing or family) adj (practice* or practitioner* or physician* or doctor* or nurs*)).ti,ab,id. 32440

58 ((Communit* or primary or social* or scheme* or wellbeing or well-being or pathway*) adj3 (refer* or linkage or program* or treat* or intervention*)).ti,ab,id. 81429

59 ((Communit* or patient*) adj2 (connector* or navigat* or advocat*)).ti,ab,id. 2036

60 (link-worker* or linkworker*).ti,ab,id. 68

61 or/48-60 [Prescribing or primary care] 290967

62 14 and 47 and 61 1992

63 limit 62 to english language 1961

64 limit 63 to yr="2000 -Current" 1803

**Applied Social Sciences Index & Abstracts (ASSIA)**

| Set# | Searched for | Databases | Results |
| --- | --- | --- | --- |
| S1 | MAINSUBJECT.EXACT("Aging") OR MAINSUBJECT.EXACT("Elder care") OR MAINSUBJECT.EXACT("Older people") OR MAINSUBJECT.EXACT("Geriatrics") | Applied Social Sciences Index & Abstracts (ASSIA) | 46627 |
| S2 | MAINSUBJECT.EXACT("Elder care") | Applied Social Sciences Index & Abstracts (ASSIA) | 2607 |
| S3 | noft((Elder* or geriatric* or senior*)) | Applied Social Sciences Index & Abstracts (ASSIA) | 63260 |
| S4 | noft((older NEAR/1 (adult OR adults OR men OR man OR women OR woman OR person OR people))) OR noft(((Age OR Aged) NEAR/3 (over OR older) NEAR/2 (50 OR 55 OR 60 OR 65 OR 70 OR 75 OR 80 OR 85 OR 90 OR 95))) OR noft(elderly OR geriatric OR geriatrics OR senior OR gerontology) OR noft(sexagenarian OR septuagenarian OR octogenarian OR nonagenarian OR centenarian) | Applied Social Sciences Index & Abstracts (ASSIA) | 97096 |
| S5 | [S1] OR [S2] OR [S3] OR [S4] | Applied Social Sciences Index & Abstracts (ASSIA)  These databases are searched for part of your query. | 102531 |
| S6 | noft((Green or blue) NEAR/5 (space or spaces or area or areas or zone or corridor or connector or environment or architecture or infrastructure or design or setting or urban or rural)) | Applied Social Sciences Index & Abstracts (ASSIA) | 531 |
| S7 | noft(Greenspace* or bluespace*) | Applied Social Sciences Index & Abstracts (ASSIA) | 102 |
| S8 | noft((Green or blue) near/5 (urban or neighbourhood or neighborhood or community or communities or city or cities or town or towns or suburb* or semiurban or periurban or semisuburban or residential or municipal or metropolitan or metropolis or agriculture or agricultural)) | Applied Social Sciences Index & Abstracts (ASSIA) | 290 |
| S9 | MAINSUBJECT.EXACT("Natural landscapes") OR (MAINSUBJECT.EXACT("Environmental psychology") OR MAINSUBJECT.EXACT("Environmentalism") OR MAINSUBJECT.EXACT("Environment") OR MAINSUBJECT.EXACT("Environmental health")) | Applied Social Sciences Index & Abstracts (ASSIA) | 3612 |
| S10 | MAINSUBJECT.EXACT("Ecological approach") OR MAINSUBJECT.EXACT("Community ecological approach") | Applied Social Sciences Index & Abstracts (ASSIA) | 130 |
| S11 | noft(((Green* or eco* or environment* or nature*) NEAR/3 health)) | Applied Social Sciences Index & Abstracts (ASSIA) | 11651 |
| S12 | noft((Green or blue or outdoor or natural or nature) NEAR/5 (gym* or activit* or recreation*)) | Applied Social Sciences Index & Abstracts (ASSIA) | 1407 |
| S13 | MAINSUBJECT.EXACT("Natural phenomena") OR noft(((NaturE OR natural or "nature based" or naturebased or outdoor) NEAR/5 (intervention or activity or activities or connected or connection or engage or engagement or engaged or environment or environmental or capital))) | Applied Social Sciences Index & Abstracts (ASSIA) | 4325 |
| S14 | noft((Nature or natural or "nature based" or naturebased or outdoor or outdoors or outside) NEAR/3 (driven or orientated or space or setting or expose or exposed or exposure or time or surroundings)) | Applied Social Sciences Index & Abstracts (ASSIA) | 2388 |
| S15 | (MAINSUBJECT.EXACT("Rural areas") OR MAINSUBJECT.EXACT("Gardens & gardening") OR MAINSUBJECT.EXACT("Plants") OR MAINSUBJECT.EXACT("Farms") OR MAINSUBJECT.EXACT("Agriculture")) OR MAINSUBJECT.EXACT("Beaches") OR MAINSUBJECT.EXACT("Forests") | Applied Social Sciences Index & Abstracts (ASSIA) | 14463 |
| S16 | noft((Ecotherapy or ecotherapeutic or ecotherapies or "care farm" or "care farming" or "care farms")) | Applied Social Sciences Index & Abstracts (ASSIA) | 46 |
| S17 | MAINSUBJECT.EXACT("Horticulture") OR MAINSUBJECT.EXACT("Nurseries") | Applied Social Sciences Index & Abstracts (ASSIA) | 195 |
| S18 | noft((Garden or gardening or gardens or horticulture or horticultural or allotment or allotments)) | Applied Social Sciences Index & Abstracts (ASSIA) | 1632 |
| S19 | noft(Park or parks or parkland or tree or trees or wood or woods or woodland or forest or river or rivers or ocean or oceans or beach or beaches or wilderness) | Applied Social Sciences Index & Abstracts (ASSIA) | 26524 |
| S20 | (MAINSUBJECT.EXACT("Golf") OR MAINSUBJECT.EXACT("Golf courses")) OR MAINSUBJECT.EXACT("Walking") OR (MAINSUBJECT.EXACT("Bicyclists") OR MAINSUBJECT.EXACT("Bicycles")) | Applied Social Sciences Index & Abstracts (ASSIA) | 4146 |
| S21 | noft(((Outdoor* or park or lawn) near/3 bowls or bowling)) | Applied Social Sciences Index & Abstracts (ASSIA) | 775 |
| S22 | (MAINSUBJECT.EXACT("Swimming") OR MAINSUBJECT.EXACT("Swimming pools")) AND noft("open water" or openwater or outside or outdoor or outdoors or wild) | Applied Social Sciences Index & Abstracts (ASSIA) | 17 |
| S23 | noft(((Swim or swimming or swimmers) near/3 ("open water" or openwater or outside or outdoor or outdoors or wild))) | Applied Social Sciences Index & Abstracts (ASSIA) | 6 |
| S24 | noft(Forest near/2 (therapy or therapeutic or bath or bathing)) | Applied Social Sciences Index & Abstracts (ASSIA) | 15 |
| S25 | MAINSUBJECT.EXACT("Activities of daily living") OR (MAINSUBJECT.EXACT("Water exercise") OR MAINSUBJECT.EXACT("Dance exercise") OR MAINSUBJECT.EXACT("Aerobic exercise") OR MAINSUBJECT.EXACT("Exercise") OR MAINSUBJECT.EXACT("Fitness training programs") OR MAINSUBJECT.EXACT("Exercise therapy") OR MAINSUBJECT.EXACT("Muscle strength")) OR MAINSUBJECT.EXACT("Yoga") OR MAINSUBJECT.EXACT("Relaxation training") OR (MAINSUBJECT.EXACT("Activities") OR MAINSUBJECT.EXACT("Recreation") OR MAINSUBJECT.EXACT("Sports")) AND (outdoor or outdoors or outside or nature or natural or urban or rural or rurally) | Applied Social Sciences Index & Abstracts (ASSIA) | 24064 |
| S26 | [S6] OR [S7] OR [S8] OR [S9] OR [S10] OR [S11] OR [S12] OR [S13] OR [S14] OR [S15] OR [S16] OR [S17] OR [S18] OR [S19] OR [S20] OR [S21] OR [S22] OR [S23] OR [S24] OR [S25] | Applied Social Sciences Index & Abstracts (ASSIA)  These databases are searched for part of your query. | 85865 |
| S27 | (MAINSUBJECT.EXACT("Referrals") OR MAINSUBJECT.EXACT("Medical referrals")) OR MAINSUBJECT.EXACT("Consultation") | Applied Social Sciences Index & Abstracts (ASSIA) | 6904 |
| S28 | noft((Prescription or prescriptions or prescribe or prescribing)) | Applied Social Sciences Index & Abstracts (ASSIA) | 17631 |
| S29 | MAINSUBJECT.EXACT("Family physicians") OR MAINSUBJECT.EXACT("Nurse practitioners") | Applied Social Sciences Index & Abstracts (ASSIA) | 8386 |
| S31 | noft(GP or GPs) | Applied Social Sciences Index & Abstracts (ASSIA) | 8428 |
| S32 | MAINSUBJECT.EXACT("Primary care") OR MAINSUBJECT.EXACT("Primary health care professionals") | Applied Social Sciences Index & Abstracts (ASSIA) | 15757 |
| S33 | noft((primary near/4 (care or health or service or center or centre or practice))) | Applied Social Sciences Index & Abstracts (ASSIA) | 40524 |
| S34 | noft((general or nurse or nursing or family) near/1 (practice or practitioner or physician or doctor or nurse or nursing)) | Applied Social Sciences Index & Abstracts (ASSIA) | 231024 |
| S35 | noft((Community or primary or social or scheme or wellbeing or well-being or pathway) NEAR/3 (refer or referral or referred or linkage or program or programme or treat or treatment or treated or intervention)) | Applied Social Sciences Index & Abstracts (ASSIA) | 35697 |
| S36 | noft((Community or patient) NEAR/2 (connector or navigation or navigator or advocate or advocator or advocated)) | Applied Social Sciences Index & Abstracts (ASSIA) | 1124 |
| S37 | noft(link-worker or linkworker) | Applied Social Sciences Index & Abstracts (ASSIA) | 49 |
| S38 | [S27] OR [S28] OR [S29] OR [S31] OR [S32] OR [S33] OR [S34] OR [S35] OR [S36] OR [S37] | Applied Social Sciences Index & Abstracts (ASSIA)  These databases are searched for part of your query. | 299180 |
| S39 | [S5] AND [S26] AND [S38] | Applied Social Sciences Index & Abstracts (ASSIA)  These databases are searched for part of your query. | 3623 |
| S40 | ([S5] AND [S26] AND [S38]) AND pd(20200101-20241030) | Applied Social Sciences Index & Abstracts (ASSIA)  These databases are searched for part of your query. | 1157 |
| S41 | ([S5] AND [S26] AND [S38]) AND pd(20200101-20241030) | Applied Social Sciences Index & Abstracts (ASSIA)  These databases are searched for part of your query. | 1157 |
| S42 | ([S5] AND [S26] AND [S38]) AND (la.exact("ENG") AND pd(20200101-20241030)) | Applied Social Sciences Index & Abstracts (ASSIA)  These databases are searched for part of your query. | 1157 |

**Overton**

**Policy**

("Green health prescription" "green health prescriptions" or "green health prescribing" or “green health prescribed” or “green health prescribe” or "Prescribing green health" or "green prescription" or “green prescriptions” or “green prescribing” or "nature prescription" or "nature prescriptions" or "nature based prescription" or “nature based prescriptions” or “nature based intervention” or "nature based interventions” or “nature based referral” or "nature based referrals” or “green referrals” or “green referral” or “green health partnership” or “nature prescription”) AND (Older or elder or elderly or aged or aging or frail or frailty) published after 01 Jan 2000 624 policy results

Scholarly articles:

("Green health prescription" "green health prescriptions" or "green health prescribing" or “green health prescribed” or “green health prescribe” or "Prescribing green health" or "green prescription" or “green prescriptions” or “green prescribing” or "nature prescription" or "nature prescriptions" or "nature based prescription" or “nature based prescriptions” or “nature based intervention” or "nature based interventions” or “nature based referral” or "nature based referrals” or “green referrals” or “green referral” or “green health partnership” or “nature prescription”) AND (Older or elder or elderly or aged or aging or frail or frailty) 10 results

**Dimensions**

"Green health prescription" OR "green health prescriptions" 17 results

"Green prescription" OR "prescribing green health" 92 results

“green prescriptions” or “green prescribing” or "nature prescription" 20 results

"nature based prescription" or “nature based prescriptions” or “nature based intervention” 11 results

“nature based referral” or "nature based referrals” or “green referrals” or “green referral” or “green health partnership” or “nature prescription” 0 results

**Google**

“Green health prescription” filetype:pdf 28 includes

“Green health prescribing” filetype:pdf 23 includes

“Green health” filetype:pdf scanned first 10 pages for relevance 16 incldues

“Green health prescription” scnned first 10 pages for relevance 8 includes

**Additional file 5: Table S5: Characteristics of studies providing evidence on barriers and facilitators for GHP and nature-based interventions**

| **Study ID** | **Study design** | **Qualitative data collection tools** | **Participants demographic** | **Objectives** | **MMAT 2018 critical appraisal score** |
| --- | --- | --- | --- | --- | --- |
| {Carreño, 2023 #36947} [34] | Mixed methods | None | - Sample size: 16 - Mean age: 54 years - Service users from local medical centres in space - Cancer diagnosis within 5 years | Whether seaside activities can lead to improvements in physiological biomarkers | 0  **Low quality** |
| {Dahlkvist, 2020 #36253} [46] | Qualitative | Descriptive study design | - Sample size 11 - Adults from residential care facilities (RCFs) - Mean age = 86 years - Moderately anxious or depressed | Residents use and satisfaction of RCF gardens | *****  **High quality** |
| {Department of Health and Social Care, 2023 #36176} [43] | Mixed methods | Semi structured interviews and surveys | - Service providers (researchers, practitioners and other stakeholders) who have experience with GSP in England | Barriers to scaling GSP equitably and perspectives | 2  **Low quality** |
| {de Bell, 2024 #46722}  [47] | Qualitative | Participatory knowledge sharing approaches including a mix of presentations, panel discussions and breakout sessions | - Sample size = 29 - Key health professionals (researchers, policymakers, and practitioners) | Opportunities, Challenges and recommendations for the development of NBSP (Nature based social prescribing) | ***  **Moderate quality** |
| {Foley, 2023 #35648}  [48] | Qualitative | Semi structured interviews | - Sample size = 13 - Professional associations, health care clinics and individual providers | To identify the needs, preferences, barriers and enablers to implementing nature prescription programs in Australia | *****  **High quality** |
| {Gribben, 2000 #35830}  [59] | Quantitative | Cross sectional survey  Fax-back questionnaire | - Sample size = 433 - General practitioners | Aim to establish the extent to which GPs in the North Health region in 1997 issued with Green Prescription packages had used them, the circumstances under which they were used, and barriers to their use. | 0  **Low quality**  No sufficient data about non responders as there was only a 73% response rate. |
| {Hassink, 2019 #36981}  [41] | Mixed methods | Phase 1: inventory of nature based adult day services  Phase 2: Semi structured interviews | - Sample size = 17 - Service providers (Social entrepreneur, nursing homes, social care organisation) | Provide insight into the characteristics of different types of nature-based ADSs in urban areas for people with dementia living at home.  Explore common and specific challenges for the development and running of different types of nature-based ADSs in urban areas. | 0  **Low quality**  A lack of evidence to show quantitative methods and data analysis. |
| {Hong, 2012 #17628}  [49] | Qualitative | Focus groups | - Sample size = 49 - Service providers (Family physicians or family medicine residents) - Average age between 30 – 60 years old | To assess the Perceptions, understanding and perception of personal and environmental factors influencing PA, especially walking, and factors affecting their counselling of obese patients about environmental motivators and barriers to PA. | *****  **High quality** |
| {Juster-Horsfield, 2021 #35647}  [50] | Qualitative | Semi structured interviews | - Sample size = 8 - Service providers (Southwest of England practitioners) - Number = 8 | Perspectives of outdoor water-based practitioners concerning opportunities to engage in such blue prescription pathways, and the likely challenges of doing so. | *****  **High quality** |
| {Lassell, 2024 #36939}  [51] | Qualitative | Focus groups and individual interviews | - Sample size = 21 - Hispanic/Latino participants living with memory challenges, care partners (6), outdoor professionals (8), and interdisciplinary healthcare providers/dementia experts (7) | A 12-week co design occupational therapist – led green activity program to gather perspectives of Hispanic/Latino individuals with memory challenges regarding nature-based interventions alongside views from stakeholders regarding referral pathways and how will it be embedded into clinical care | *****  **High quality** |
| {Leng, 2020 #14700}  [42] | Mixed methods | Formal interviews and survey questionnaires | - Elderly residents with and without cardiovascular disease and doctors   Participants in questionnaire   - Mean age 67.5 years - Sample size = 188   Participants in interview   - Sample size = 40 - 68 years | Understand the exercise characteristics in green spaces with elderly residents and understand the principles and contents of exercise prescription for Cardiovascular health and identify the requirements for green spaces | *  **Low quality**  A lack of qualitative data, regarding the data methods, data analysis and little to no quotes supported. |
| {Lo, 2019 #13240}  [52] | Qualitative | Semi structured interviews | - Sample size = 22 - Pre frail residents - Mean age 86 years | To focus on meaning, understanding and explaining views and experiences of individuals | *****  **High quality** |
| {Maund, 2019 #15273}  [35] | Mixed methods | Focus groups and semi structured interviews | - Sample size = 16 - Individuals diagnosed with anxiety and/or depression - Age 18-29 (3), 30-49 (5), 50-64 (5), 65-84 (5) | Investigating the effects of the wetland NBI towards mental health of individuals diagnosed with anxiety and/or depression; and what specific characteristics of the wetland NBI design support nature engagement and wellbeing effect. | ***  **Moderate quality**  No confounding expected, or appropriate methods to control for confounders and a lack of justification to support why a mixed methods were used, particularly in the quantitative section |
| {Marx, 2022 #33739}  [53] | Qualitative | Focus group discussions | - Service providers (GP, NHS healthcare professionals, health walk leaders, community garden facilitators) - Sample size = 25 - service users (carers, older people) - Sample size = 10 | Highlight strengths and weaknesses and opportunities within the proposed pathway prior to delivery | **  **Low quality**  There are no quotes within the text to support the justification for the chosen themes |
| {McHale, 2020 #34137}  [54] | Qualitative | Focus group, semi structured interviews and telephone interviews. | - GHP project officers, HGP steering group members, key strategic stakeholders - Sample = 55 | Views and experiences in the establishment of Green Health prescribing across four Scottish health boards | *****  **High quality** |
| {McCaffrey, 2011 #39066}  [36] | Mixed methods | Focus groups | - Sample size = 39 - Community dwelling older adults - Diagnosed depression - Average age = 74 years | Positive and Negative Affect Schedule  (PANAS), post intervention focus group and interviews | **  **Low quality**  No quotes - themes listed and summary paragraph of discussions and a lack of integration in the findings between the qualitative and quantitative components. |
| {Mitchell, 2023 #32366}  [55] | Qualitative | Semi structured interviews | Older adults and key stakeholders | Explore urban nature-based health interventions (NBIs) such as care farming and community gardening and to ascertain the value of NBIs to older populations and how they can benefit them | ****  **High quality** |
| {Okvat, 2012 #33058}  [37] | Mixed methods | Interviews | Urban older adults | The benefits of adult’s well-being from traditional and mindful community gardening | 2  **Low quality** |
| {Perkins, 2011 #33043}  [38] | Mixed methods | Surveys | - Older adults from local communities - Sample size = 31 - Mean age = 72 years | Determine the impact of HT on participants wellbeing, self-esteem, self-efficacy and social isolation | 0  Low quality  A lack of quality in the qualitative component which does not adhere to the quality criteria |
| {Perez, 2024 #13425}  [56] | Qualitative | Semi structured interviews | - Latino adults from Catholic churches - Sample size = 24 - Mean age 55 years | To evaluate a multilevel intervention linking churches with local Parks to promote Physical activity | *****  **High quality** |
| {Redvers, 2024 #19668}  [57] | Qualitative | Semi structured interviews | - Physicians (13) and indigenous older people (6) - Sample size = 19 | The views and perspectives of nature prescriptions and patient planetary health co-benefit prescribing | *****  **High quality** |
| {Smock, 2024 #19629}  [44] | Mixed methods | Open ended questions. Delphi method | - Stakeholders (Worked in parks and recreation fields with other fields of land management and public health) - Sample size = 53 | Perceptions, terminology and opinions and participation in NBHIs for future research priorities. | ***  **Moderate quality**  Unsure on the qualitative data collection/methods and no appropriate justification to support this. |
| {Sterckx, 2024 #46723}  [58] | Qualitative | Semi structured interviews | - Health care professionals and health care managers and nature management coordinators - Sample size = 22 | Barriers regarding the domains of nature management (with focus on biodiversity) and healthcare (with focus on primarily NBI). | *****  **High quality** |
| {Thomson, 2020 #14391}  [39] | Exploratory sequential Mixed methods | Participant observation and in-depth, semi-structured interviews. | - Adult mental health service users - Sample size: Phase 1 = 24, and Phase 2 = 20 - Average age = 53 years | Views and experiences of link workers within the cultural sector of social prescribing | ***  **Moderate quality**  Unclear of the integration of results and unsure on the sample size being reduced in phase 2 of the study leading to selection bias |
| {Tierney, 2022 #33864}  [60] | Rapid realist review | Online cross-sectional survey | - Link workers (Primary care network (PCN), voluntary – community sector, social enterprises and charities) - Sample size = 148 - Aged between 41-60 years | Views and experiences of use of the cultural sector within social prescribing | ***  **Moderate quality** The data does not allow to address the research question. To understand the views and experiences, qualitative data collection and analysis would be more appropriate in addressing the research question compared to a cross-sectional survey which limits the depth of data. |
| {Tse, 2010 #37418}  [40] | Mixed methods | Interview | - Residential nursing homes of older adults - Sample size = 26 (experimental group) and 27 (control group) - Aged > 60 years | Explore the activities of daily living and psychological wellbeing and examine the effectiveness of an indoor gardening programme | **0**  **Low quality** |
| {Uijtdewilligen, 2019 #15114}  [45] | Mixed methods | A focus group (FG) and series of short interviews | - Considered healthy adults - Sample size: 97 Completed surveys and 16 participated in focus groups | Qualitative: motivating factors and perceived benefits, reinforcing factors, enabling factors and barriers. Quantitative: Weekly activity of park uses | *  **Low quality**  Unclear integration of results and unclear whether there were no inconsistencies or if they just weren't addressed. |

**Additional file 6: Table S6:** MMAT Quality assessment scores

| **Study ID** | **Study design/methodology** | **Screening questions** | | **Qualitative designs** | | | | | Overall quality score |
| --- | --- | --- | --- | --- | --- | --- | --- | --- | --- |
|  | Question clear? | Question addressed? | 1.1. | 1.2 | 1.3 | 1.4 | 1.5 |
| {Dahlkvist, 2020 #36253}  [46] | Descriptive design using behaviour mapping observations | Yes | Yes | Yes | Yes | Yes | Yes | Yes | ***** |
| {de Bell, 2024 #46722}  [47] | Interdisciplinary and participatory expert group workshop | Yes | Yes | Yes | Yes | Yes | No | No | *** |
| {Foley, 2023 #35648}  [48] | Semi structured interviews | Yes | Yes | Yes | Yes | Yes | Yes | Yes | ***** |
| {Hong, 2012 #17628}  [49] | Focus groups | Yes | Yes | Yes | Yes | Yes | Yes | Yes | ***** |
| {Juster-Horsfield, 2021 #35647}  [50] | Semi structured interviews | Yes | Yes | Yes | Yes | Yes | Yes | Yes | ***** |
| {Lassell, 2024 #36939}  [51] | Focus groups and individual interviews | Yes | Yes | Yes | Yes | Yes | Yes | Yes | ***** |
| {Lo, 2019 #13240}  [52] | Semi structured interviews | Yes | Yes | Yes | Yes | Yes | Yes | Yes | ***** |
| {Marx, 2022 #33739}  [53] | Focus group discussions | Yes | Yes | Yes | Yes | Unsure | No | No | ** |
| {McHale, 2020 #34137}  [54] | Focus group discussions and semi structured interviews | Yes | Yes | Yes | Yes | Yes | Yes | Yes | ***** |
| {Mitchell, 2023 #32366}  [55] | Semi structured interviews | Yes | Yes | Yes | Yes | Yes | Unsure | Yes | **** |
| {Perez, 2024 #13425}  [56] | Semi structured interviews | Yes | Yes | Yes | Yes | Yes | Yes | Yes | ***** |
| {Redvers, 2024 #19668}  [57] | Semi structured interviews | Yes | Yes | Yes | Yes | Yes | Yes | Yes | ***** |
| {Sterckx, 2024 #46723}  [58] | Semi structured interviews | Yes | Yes | Yes | Yes | Yes | Yes | Yes | ***** |

| **Study** | **Study design/methodology** | **Screening questions** | | **Quantitative descriptive studies** | | | | | Overall quality score |
| --- | --- | --- | --- | --- | --- | --- | --- | --- | --- |
|  | Question clear? | Question addressed? | 4.1 | 4.2 | 4.3 | 4.4 | 4.5 |
| {Gribben, 2000 #35830}  [59] | Questionnaire survey | Yes | unsure | Unsure | Unsure | Unsure | No | No | 0 |
| {Tierney, 2022 #33864}  [60] | Coss sectional questionnaire | Yes | No | Yes | Yes | Yes | No | No | *** |

|  | ***Screening Questions*** | | **Qualitative** | | | | | **Quantitative RCT** | | | | | **Quantitative NRS** | | | | | **Quantitative Descriptive** | | | | | **Mixed Methods** | | | | | **Score** |
| --- | --- | --- | --- | --- | --- | --- | --- | --- | --- | --- | --- | --- | --- | --- | --- | --- | --- | --- | --- | --- | --- | --- | --- | --- | --- | --- | --- | --- |
|  | *Question clear?* | *Question addressed* | 1.1 | 1.2 | 1.3 | 1.4 | 1.5 | 2.1 | 2.2 | 2.3 | 2.4 | 2.5 | 3.1 | 3.2 | 3.3 | 3.4 | 3.5 | 4.1 | 4.2 | 4.3 | 4.4 | 4.5 | 5.1 | 5.2 | 5.3 | 5.4 | 5.5 |  |
| [34] | Y | U | N | N | N | N | N |  |  |  |  |  | Y | Y | N | Y | Y |  |  |  |  |  | N | N | N | N | N | 0 |
| [43] | Y | Y | Y | Y | Y | Y | Y |  |  |  |  |  |  |  |  |  |  | N | Y | U | U | Y | Y | N | N | Y | N | ** |
| [41] | Y | Y | Y | Y | Y | Y | Y |  |  |  |  |  |  |  |  |  |  | U | U | N | N | N | N | U | N | N | N | 0 |
| [42] | Y | Y | Y | U | N | N | N |  |  |  |  |  | N | Y | U | U | U |  |  |  |  |  | Y | Y | N | U | U | * |
| [35] | Y | Y | Y | Y | Y | Y | Y |  |  |  |  |  | Y | Y | Y | N | Y |  |  |  |  |  | U | Y | Y | Y | U | *** |
| [36] | Y | Y | Y | Y | N | N | N | U | Y | Y | Y | U |  |  |  |  |  |  |  |  |  |  | Y | N | N | Y | N | ** |
| [37] | Y | Y | Y | Y | Y | Y | Y | U | U | Y | Y | U |  |  |  |  |  |  |  |  |  |  | Y | Y | Y | Y | N | ** |
| [38] | Y | Y | N | N | N | N | N |  |  |  |  |  | Y | Y | Y | N | U |  |  |  |  |  | N | N | U | N | N | 0 |
| [44] | Y | Y | Y | U | Y | Y | U |  |  |  |  |  |  |  |  |  |  | Y | U | Y | Y | U | Y | Y | Y | Y | U | *** |
| [39] | Y | Y | Y | Y | Y | Y | Y |  |  |  |  |  | U | Y | Y | N | Y |  |  |  |  |  | Y | Y | U | Y | N | *** |
| [40] | Y | Y | Y | N | Y | Y | N |  |  |  |  |  | Y | Y | Y | N | Y |  |  |  |  |  | N | N | N | U | N | 0 |
| [45] | Y | Y | Y | Y | U | Y | U |  |  |  |  |  | Y | Y | N | N | Y |  |  |  |  |  | Y | U | U | N | N | * |

**Additional file 7: Table S7:** Supporting quotes of barriers

| **Theme** | **Sub theme** | **Additional quotes** |
| --- | --- | --- |
| **Accessibility and participation barriers** | Transportation constraints | - *“People don’t come, because they can’t get parking, and everywhere is permits. Some people don’t have [blue] badges, so can’t park on the [double] yellows [lines] outside the front, so they can’t come.... We can’t get things into the site, like soil, because you can’t carry it far” [55]*   *“There is an issue getting to places like this. I mean there are no buses, and I am not currently able to drive. So as much as I would love to come here every day I can’t. That’s why the minibus for this was so important. It really made a difference"* [35]   - *“Well yes because I don’t have a car, I would just wait for my husband to return from work, and sometimes would get home a bit late and then there was no time to get there, and to go by bus it takes longer.”* [56] |
| Programme Inclusivity and mobility challenges | - *“I find a lot of people I talk to these days; they’ve actually got learning disabilities and autism, and differences in how they want to consume information. And I find as well that people that are living with persistent pain get a lot of brain fog. So, resources like word heavy material are not going to be suitable for them, whereas a short phone call or something that is available, even on a website that they can look at, at a time that suits them”.* [48] - *Some people walk too fast for me, because I always have to moan at them because they are walking too fast. I always have to ask for them to slow down"* [35] - *“It's not great, it's hard to walk on the gravel with my walker”* [46] - *“We walk too slowly, when we cross the road slowly, the drivers would wait for and dislike us it’s not convenient to go too far for exercise"* [42] - “*I have a hard time moving forward with this chair. In the grass over there you have to go up and down. I think, oh God, I’m gonna tip over here soon. It's an awful feeling; I really don't want to go up there”* [46] |
| Environmental hazards | - *“It's so windy it's like you feel now something's coming. Well, that's how it is, hope I can manage it* [46] - *“We’d have more people if the weather was nicer, but obviously I can’t affect that. There are some that if it looks a little grey outside, they will refuse to go outside to do anything.”* [55] - *"I dare not go to exercise in the green spaces far from my home, the road is too slippery; I exercise almost every day, but I don’t go to exercise if it’s frozen; I only walk around my home, all know that the green space environment is good, but if I suddenly fall down, no one is around, what to do if there is an accident, my family cannot set their mind at rest"* [42] - *It was really important to create a safe space and a space that’s enabling, and recognising that the sea and the beach and coasts can be spaces of overwhelm-, of risk, of fear . . . so it’s how do you turn that into a transformative experience”* [48] - *Nature can have its own dangers-swimming in the ocean, hiking in the woods or high grass; even gardening could cause allergies for some individuals”* [44] - *“May not be easy to do in bad weather”* [44] - *“Wildlife can be intimidating”* [44] - *I don't want to sit in the hot sun, I sit in the shade in the summer, otherwise I get a headache”* [44] - *“It's so windy it's like you feel now something's coming. Well, that's how it is, hope I can manage it*  [44] - *We’d have more people if the weather was nicer, but obviously I can’t affect that. There are some that if it looks a little grey outside, they will refuse to go outside to do anything.’ [55]* |
| **Cultural sensitivity** |  | - *“Just getting across the idea that you might go into the doctors for a physical ailment or mental health issue, and that being referred to a gardening group is okay . . . There is a whole cultural thing that needs changing between patients, the wider community, the doctors, the occupational therapists, and all the referral partners”* [54] - *“Well, you have to contextualize. I’m saying this to some Indigenous Peoples, like who the hell am I? The cultural context I think is important. That may be a challenge it may be perceived as paternalistic and sort of contrary to our shared history, when in fact . . . and as a non-Indigenous individual who’s been part of this process of, how do you say it, not exactly promoting the destruction of nature but I think you understand what I’m saying”* [57] - *When I’m working in a primarily Indigenous context, I am a visiting settler, I’m very aware of that. I feel absolutely not comfortable, and I feel like it’s inappropriate to talk about prescribing nature and I think we’ve had those discussions in our meetings before about how challenging that is, to have something that’s been part of culture and a lifestyle forever, then being medicalized and written on a piece of paper, like it’s so ridiculous"* [57] - *To prescribe nature to an Indigenous person. We might have to have a conversation about that. We probably should, now that I think about it actually, but before we launch that program, or at least really look at the messaging, to make sure that the messages are communicated in a non-patriarchal way that acknowledges that we are now a western entity that is recommending a return to what was and is a way of life" [57].* |
| **Prescriber hesitancy and lack of buy in due to medicalisation of nature** |  | - *“Not backed by workplace. How can people take the “medicine prescribed” if the workplace does not support the prescription?”*  [44] - *“When we start something new like this (a nature-based intervention), it is important someone has already tried it out and that we can rely on the literature. We always start a literature review and then we look at what exists, but when we get into practice, we also let go of that to some extent, like, okay the science is there but we look to what we can use practicality and what is workable for us”* [58] - *“I think sometimes we shoot ourselves in the foot though, because you know we just give them their diet pills and the shakes, ‘Here take this, this will solve your problems,’ and we don’t say ‘You got to come in once a week, you got to show me your exercise and your diet history’. They are looking for an easy fix. It is easier to take a pill, or take a shake than to exercise once a week”*  [49] - *We’re all evidence-based practitioners, so we’re looking to draw on evidence”* [48] - *"They can see I’m not a hypocrite; I practice what I preach. Also doing it and being involved, you’re more familiar with what’s available and can readily talk about it in a more meaningful way, a more personal way”* [48] |
| **Lack of knowledge and experience with nature** | Limited understanding among Service users | - *“Some people just don’t have much experience in nature or think it’s a bit, you know, airy-fairy, or they might have an aversion to bugs or getting dirty feet"* [48] - *You’ve got the likes of [a particular county] which has loads of coastal towns and they’re more deprived along that coastal route…very deprived, isolated coastal towns. Although they probably have green space and they’ve got a blue setting”* [43] |
| Lack of knowledge among primary care professionals | - *“So whenever I’ve met social prescribers, they basically said like they don’t really refer to much green stuff. And they’re not aware of the green provision that’s out there. And then if I speak to good kind of health and nature projects and ask if they are getting referrals from prescribers, they normally say no it’s just self-referrals and they’re struggling to get in touch with social prescribers. So like the connections don’t seem to be there and if they are it’s like ‘wow, it’s actually working!”* [43] - *“to raise the profile of the benefits of connecting with nature and that there really are nature-based activities going on that [link workers] can refer to”* [43] - *I also think that the distribution of knowledge…everyone’s trying to do the same thing. Everyone’s trying to get their own directory together. Everyone’s trying to and it’s a bit of a mish mash at the minute”* [43] - *“No, they [staff] do not talk about it in our daily conversations…” My family knows [about the horticultural therapy programme], but they are too busy … The staff? Well, they have not said much about it”. [52]* - *It is a newer science and people seem to be weary from the idea of it. Not enough medical authorities are participating yet” [44]* |
| **Socio economic and environmental disparities** |  | - *“Because that’s another massive thing is transport and actually the first step to getting someone who may have complex issues to actually attend a session somewhere. It’s such a big thing…And then do they have the right kit, [especially] some people living in maybe deprived communities. Do they have waterproofs, and do they have footwear to go out and go for a walk?”* [43] - *“Can have barriers to experiences-cost, transportation, not feeling saf*e, not accessible**”** [44] - *“I’m cautious again about making that outdoor prescription, or nature prescription, especially in the middle of winter, because if people don’t have the wherewithal, or even the clothes, like the expense or the amount of money it costs to get the right clothes to be able to spend time outside. That’s also a factor. So, if you’re prescribing a family that’s living on $500 a month, you need to take your kids outside more often throughout the winter months, that’s just pushing them further and further away from trusting you as a medical professional and actually taking your advice* [57] - *“May be costly and hard to sustain without financial support to cover fees, transportation, program staff, etc”* [58] - *“They are aware of the pollution; they say they can taste and smell it” which “ Sometimes puts them off working outside”* [55] - *There is endless research that tells us why people don’t use green spaces, because they feel unsafe, they don’t feel welcome”* [[55](#_ENREF_55)]*.* - *“People need to be galvanised and motivated, and you can’t guarantee that people will do something unless someone takes ownership…when you work in deprived areas, for some reason, they need permission to do something. I don’t know why, and I haven’t tried to understand why some need permission to value or do something”* [43] |
| **Organisational capacity for service delivery** | Consultation time constraints | - “*Getting the staff on board is an issue: caregivers feel that their day is full as it is, and now they want us to do this as well”* [41] - *“Obviously social link workers, they’re really, really important because they provide the signposting for the patient if you like, and they always tell me they’re really, really busy. They just do not have enough time, and they need the information at their fingertips”…[35]* - *“We often receive a high amount of referrals that are mainly due to complex health issues and/or complex mental health issues. These can be more difficult to support and often involve needing more ‘hand-holding’ than a typical social prescribing referral. Because of this the time for a patient to remain in service is a lot longer than the desired 6 weeks and results can vary and we can often have little to no impact in the first instance, needing to offer more targeted and intensive work to get positive outcomes”* [43] |
| Financial sustainability | - “*And then you get funding, it’s only for what a year or 2 or something and I was talking to {a person} who runs this amazing garden, therapeutic horticulture place… He’s saying he spends probably at; least half of his time writing bids. Which you know when most of them don’t work or are unsuccessful, it must be soul destroying”* [43] - *“Urban agriculture requires both financial and political legitimacy to increase its contribution to feeding cities. While there is an increased political support, financial support for urban producers remains quite limited”* [55] - “*We are growing exponentially, and it is leading to burn out. Feel totally unvalued because of the constant anxiety to find funds. Filling funding forms is stressful and takes a huge time for small charities like ours…“I think one of the greatest barriers for our local green activities is getting continual core funding so they can offer regular sessions. Then as a social prescriber I would have time to get to know what is running and refer clients to it before it ends. Our clients need long-term input not time bound interventions”* [43]. - *“Not backed by insurance. Expenses should be reimbursable”* [44] - *“You also have to pay the facilitators, so you’re sitting not just worrying about yourself, but you have got to work out who needs it most. It’s an awful position to be in”* [55] - *So unless someone’s at the top of their field, you don’t have a 35–40-year-old instructor taking out young people and families, and yet they’re the ones with enough experience to do all stuff we’ve been talking about. So, as an industry, it’s really sad . . . and the consequences of doing something wrong as an instructor are enormous" We have a great instructor team and they’re on average, dare I say it, pretty old . . . we have people who’ve got specialisms in disability . . . the team tries to give feedback to each other and we learn stuff, but also, with the charitable funding, every time we go for something, we try and build in a training component . . . so gradually our instructor team are all being trained in various things . . . Yet, outdoor sports are probably the most unregulated. Like, anybody could set up and do coasteering and you could do it tomorrow. As long as you were willing to take the risk on insurance, then what stops you”* [50] - *We are growing exponentially, and it is leading to burn out. Feel totally unvalued because of the constant anxiety to find funds. Filling funding forms is stressful and takes a huge time for small charities like ours.* [43] - *“I think one of the greatest barriers for our local green activities is getting continual core funding so they can offer regular sessions. Then as a social prescriber I would have time to get to know what is running and refer clients to it before it ends. Our clients need long-term input not time bound interventions”* [43] |
| Staff | - *“As I said at the beginning, the enthusiasm early on is fantastic, but it is harder to keep* *that up. That really is a problem and not only financially, but also due to the turnover of staff. The lack of knowledge, not knowing exactly what you can do with it, connection of an experience that is not always great.* [41] - *“You might really need to have like a social worker on your team, because. . . if the person maybe does [have] the insurance, they might have access to more support than they actually realize. Maybe they have a long-term care program that might be able to give them some assistance with getting around. So there may be more options than they know, but you would need a kind of an advanced social worker to be able to look into that”* [51] - *“We can only run spring to the end of autumn . . . And then winter we have a whole six months of the year where we don’t run . . . that also means that the people that are sat on the waiting list from the referral list, if they get referred in September, then there’s another six months at least . . . it makes the waiting list so much longer because they’ve got that whole six-month gap where they don’t do anything"* [50] - *As I said at the beginning, the enthusiasm early on is fantastic, but it is harder to keep* *that up. That really is a problem and not only financially, but also due to the turnover of staff. The lack of knowledge, not knowing exactly what you can do with it, connection of an experience that is not always great.* [41] - *“We can only run spring to the end of autumn . . . And then winter we have a whole six months of the year where we don’t run . . . that also means that the people that are sat on the waiting list from the referral list, if they get referred in September, then there’s another six months at least . . . it makes the waiting list so much longer because they’ve got that whole six-month gap where they don’t do anything"* [50] - *“Not enough medical authorities are participating yet”* [44] |
|  | Lack of training and standardisation | - *I think GPs are beginning to realise that there are other options. But it’s often difficult for them, I think, to know where to send people. And they probably need a bit more education on it”* [50] - *"I think we’re all vaguely aware of the benefits of what we do but I think if we were going to offer it as something formalised, then those people that wanted to get involved might need some training. Because I think what we do is all very lovely but it’s all done by feel if you like, and I don’t know of anyone who has particular training or even experience in the right way to offer a service to get a positive result for someone, it’s all sort of intuitive"* [50] |
| **Evidence based evaluation and practicality** |  | - *“Healthcare providers are overwhelmed and adding this to their plate is challenging… clinicians want to have a way to measure follow-through and effectiveness, the data/process is not there yet”. [44]* - *“When I’ve met with providers and social prescribers, the referral pathways don’t seem to be there at all. It’s very rare where I’ve actually seen examples of social prescribing happening in the way it’s meant to”.* [43] - *“When we start something new like this (an iNBI), it is important that someone has already tried it out and that we can rely on the literature. We always start with a literature review and then we look at what already exists, but when we get into practice, we also let go of that to some extent, like, okay the science is there but we look to what we can use practically and what is workable for us.”* [58] - *“We have had a lot of conversations on the site, when we have been digging and working. In that way it can provide as much of a service as a therapist could from the NHS, but obviously to the right person. In that way, I feel that it could benefit the NHS. If there were more projects like this and it was more inclusive, I think it could definitely help people”* [55] |

**Additional file 8: Table S8: Supporting quotes of enablers**

| **Main Theme** | **Additional quotes** |
| --- | --- |
| Green Space accessibility and environmental factors | - *“Man, we can access nature within minutes of just about anywhere in the North. . . We’re just so fortunate to live in a part of the world where we’re absolutely blessed with an absolutely phenomenal nature environment that’s easily accessible”* [57] - “*Ever since I came here, I’ve tried to take advantage of every ray of sun there's been”*, *“Yes, it's the sun I enjoy, my best ever free friend”*[40] |
| Social engagement and motivation | - “*I liked having a chance to talk with others and having something to do together. I got to know more friends through the horticultural therapy activities … lots of friends…. Joining the horticultural therapy activity was nice; it was fun. We chatted while working together in a group. I liked having a chance to talk with others and having something to do together”*[37] - *"I feel more relaxed and happier to talk to people more. "Being here I have met some wonderful people. I don’t feel so alone. I think that is really important for people like us. You do need to get out and about, but not just with family members, with other people that understand you. I think a lot of us probably feel like we don’t really fit in. I think here we just understand each other. I think we will definitely try to come back here together. I feel like I have made some great friends definitely*[35] - *“I thought gardening ….meant growing plants and chatting to others….a place of social interaction between my neighbours…”* [40] - *I think it’ll be difficult [to encourage me] . . . but if it’s a group walking activity, I would consider taking part because my friends are all there”* [45] - *“Old people tend to have lots of health issues, and they just want someone to talk to about them. So, having this project would give them this chance to moan about their issues, and then maybe reduce the likelihood that they will go to a doctor to do the same. I don’t think they’re looking for help, like medical help, they just want someone to moan to about it” (Public, female, mid 30s).* [55] - *“I got to know more friends through the horticultural therapy activities … lots of friends….Joining the horticultural therapy activity was nice; it was fun. We chatted while working together in a group. I liked having a chance to talk with others and having something to do together.”* [52] - *"being here I have met some wonderful people. I don’t feel so alone. I think that is really important for people like us. You do need to get out and about, but not just with family members, with other people that understand you. I think a lot of us probably feel like we don’t really fit in. I think here we just understand each other. I think we will definitely try to come back here together. I feel like I have made some great friends definitely [35]* - *I think it’ll be difficult [to encourage me] . . . but if it’s a group walking activity, I would consider taking part because my friends are all there” [45]* |
| - *“I do not feel useless, dodging about the house, I have a sense of purpose, I have to garden”,  “I have tasks to do, so am doing something”* [55] - *“When you’re gardening, you’re right there close to it [nature]. You can touch it, feel it, smell it. In a Jeep, you’re more removed, and you’re observing from a distance. Hiking…your goal is to get to a place…Although you look at stuff along the way, that’s not your main objective. Your main objective is to hike to a location, have a picnic or…swim or do whatever…When you’re gardening though, your goal is different. You’re focusing on just being there… rather than to get somewhere or something”* [37] - *“I did feel a lot happier, every time I finished the session. I felt a sense of achievement very much so, self-esteem… a sense of belonging as well and doing something that refers to myself and especially with other people. It just made me feel not only more solid within my beliefs in myself and what I can do but a lot more connected, because it was done in a group session as opposed to a one – one”* [39] - *“I don’t leave the house. I don’t get no real exercise. Coming here though you don’t even notice you’re doing the exercise. You’re walking around and it is good for you, but it’s not mandated. It’s enjoyable”*[35]. - *“I did some raking and just had fun, you get to show that you know how to do something”* [40] - *“…it was something happy and pleasurable….I have a sense of responsibility to care for my plants and, well…I could do it…putting them in the sun…”* [40] - *“My main motivation is being able to share a long-term, which is a nearly sixty-five year, interest in gardening with other likeminded folk”*[55] - *“I have tasks to do, so am doing something”* [55] - “*If you can get people doing both part-time, like the work and gardening, then it makes the transition easier. They build up friends, so mentally it’s not as bad, because they go from seeing people every day to not very often’ (Bertha, charity in GM) [55]* - *“my main motivation is being able to share a long-term, which is a nearly sixty-fiveyear, interest in gardening with other likeminded folk” [55]* |
| Provider commitment and enthusiasm | - *“I wouldn’t have come somewhere like this by myself. I would have done in the past, but now my anxiety stops me. But now I have been and because you all [wetland site staff] supported me I think I would feel better about coming again. Maybe not by myself but with a friend. I think I have done a lot more because of the support from everyone than I would normally” [35].* - *“As an advisor and caregiver, I have spent years on initiatives for people with dementia in relation to a green environment. Only this time, I do it myself. I made it my own enterprise. It is a kind of personal passion” [41]* - *BHI speaks to the whole person—physically, mentally, emotionally and socially” “Any prescription from a qualified professional can help increase time outdoors. The health benefits are clear from the research”.  [44]* - *“It will be no issue meeting you every week. But for some other people, they might say, oh, I couldn’t get [to] the activity today. I couldn’t do this. So I think maybe like 2 weeks and then once on the phone for a few minutes, I guess to discuss whatever it would be, it would be good, I think.”* [51] - *“As I said at the beginning, the enthusiasm early on is fantastic, but it is harder to keep that up. That really is a problem and not only financially, but also due to the turnover of staff. The lack of knowledge, not knowing exactly what you can do with it, connection of an experience that is not always great”.  [41]* - *“One of our big successes was a green health event ( . . . ) we had over 170 health and social care professionals ( . . . ) healthcare support workers, social workers, nursing staff and consultants. ( . . . ) Green health providers offered taster activities, and they went round each of the different activities to see what we meant by green health”* [54]*.* - *“They take you out when you can't do it yourself, it's great. On the weekends you better hope someone comes to visit so you can go outside, otherwise the days are long” [40]* - *“And I think that’s another critical thing. It often comes down to individuals…so you’ve got [a certain individual] running this green care network. He’s like a sort of dynamo of energy. He’s brilliant. And without him I don’t think any of that would have happened. So he’s brought together all of this stuff into a network. New activities are happening simply because you’ve got that one individual who’s really bought into it all. And, you know, we could do with [a person like this] in every county really” [43],* - *“Must telling someone to go out and do something through a script it is, I would dare say, very ineffective. But if you have health coaching/behaviour change skills, you can work with someone over their ambivalence to change and get them to a point where they may be ready to action some change I’ll try and use their physical medical conditions as a motivating tool. (...) You relate the situation to the medical condition, and they become motivated to do something about it, and they see the results, and so they keep doing”*[48] |
